# Supplementary material for: Cockayne Syndrome-Associated CSA and CSB Mutations Impair Ribosome Biogenesis, Ribosomal Protein Stability, and Global Protein Folding
Source: MDPI journal article supplement (doi:10.3390/cells10071616), 2021-06-28
Supplement: s1 [file s1]

**Figure S1**

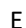

| Primer    | Forward                      | Reverse                        |
|-----------|------------------------------|--------------------------------|
| 47S       | <i>TGTCAGGCGTTCTCGTCTC</i>   | <i>AGCACGACGTCACCACATC</i>     |
| 18S       | <i>CGATGCGGCGGCGTTATTCC</i>  | <i>GAACGGCCATGCACCACCAC</i>    |
| 28S       | <i>AGTCGGGTTGCTTGGAATGC</i>  | <i>CCCTTACGGTACTTGTGTGACT</i>  |
| 28S/ETS   | <i>ACCTGGCGCTAAACCATTCGT</i> | <i>GGACAAACCCTTGTGTGAGG</i>    |
| 5.8S/ITS2 | <i>TCGTGCGTCGACGCAG</i>      | <i>ATTGATCGGCAAGCGACGCTCAG</i> |

Figure S1. (A) Full image of a northern blot analysis in all cell lines. Membranes were hybridized with ITS1 probe, further stripped and re-probed with ITS2. (B) Quantification of different intermediates of pre-rRNA species normalized to the 47S level. (C) Relative quantification of the mature 28S rRNA abundance in CS cells. Values are represented as mean  $\pm$  SD of at least three independent experiments (\*= $p$ <0.05, \*\*= $p$ <0.01, \*\*\*= $p$ <0.001). (D) QPCR was run with the different annealing temperatures **60°C (28S/ETS)**, **64°C (5.8/ITS2, 18S)** and **68°C (47S)**. (E) Primer list used in this study

Figure S2

A

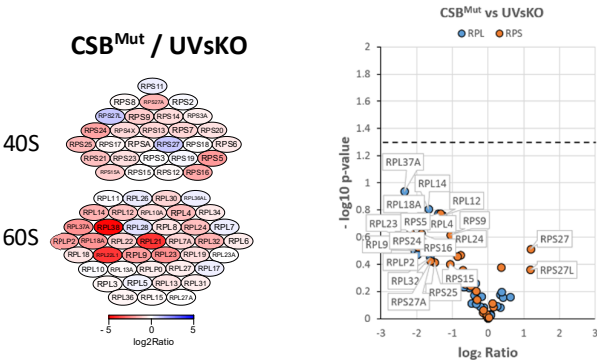

B

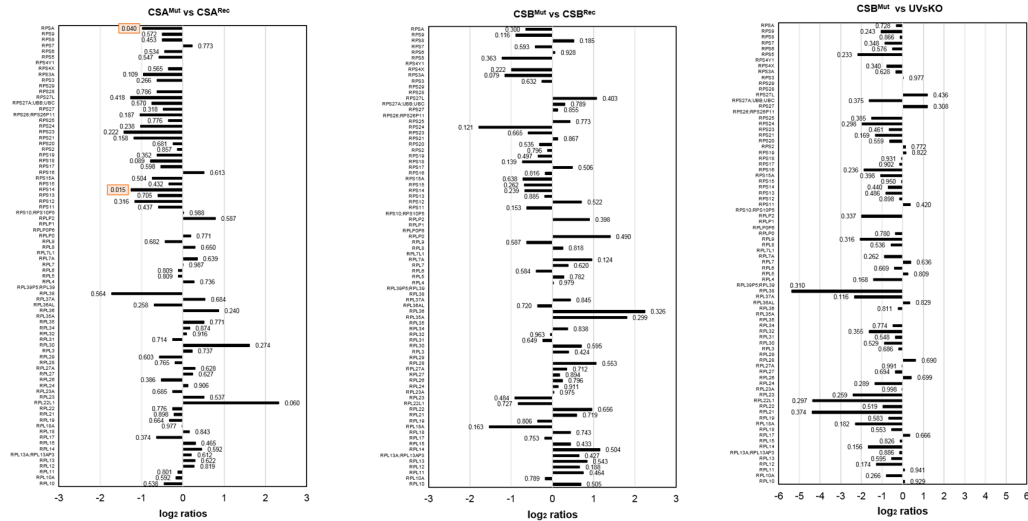

C

| Protein names   | Peptide counts (unique) | Protein names  | Peptide counts (unique) |
|-----------------|-------------------------|----------------|-------------------------|
| RPL1            | 12                      | RPS10-RPS20S   | 5-3                     |
| RPL10A          | 13                      | RPS11          | 13                      |
| RPL11           | 10                      | RPS12          | 13                      |
| RPL12           | 7                       | RPS13          | 8                       |
| RPL13           | 8                       | RPS14          | 11                      |
| RPL13A-RPL13AP3 | 0.5                     | RPS15          | 6                       |
| RPL14           | 5                       | RPS15A         | 7                       |
| RPL15           | 11                      | RPS16          | 10                      |
| RPL17           | 7                       | RPS17          | 8                       |
| RPL18           | 10                      | RPS18          | 10                      |
| RPL18A          | 6                       | RPS19          | 8                       |
| RPL19           | 6                       | RPS21          | 10                      |
| RPL21           | 7                       | RPS22          | 6                       |
| RPL22           | 5                       | RPS23          | 7                       |
| RPL22L1         | 3                       | RPS24          | 7                       |
| RPL23           | 8                       | RPS25          | 6                       |
| RPL23A          | 12                      | RPS25S         | 6                       |
| RPL24           | 7                       | RPS26-RPS26P11 | 5-4                     |
| RPL26           | 2                       | RPS27          | 3                       |
| RPL27           | 8                       | RPS27A-UBB-UBC | 6-0-0                   |
| RPL27A          | 6                       | RPS27L         | 2                       |
| RPL28           | 9                       | RPS28          | 2                       |
| RPL29           | 2                       | RPS29          | 1                       |
| RPL3            | 21                      | RPS3           | 71                      |
| RPL30           | 6                       | RPS3A          | 10                      |
| RPL31           | 8                       | RPS4X          | 7                       |
| RPL32           | 6                       | RPS4P1         | 6                       |
| RPL34           | 6                       | RPS5           | 24                      |
| RPL35           | 5                       | RPS6           | 11                      |
| RPL35A          | 2                       | RPS7           | 12                      |
| RPL36           | 5                       | RPS8           | 10                      |
| RPL36A          | 5                       | RPS9           | 12                      |
| RPL37A          | 4                       | RPSA           | 15                      |
| RPL38           | 6                       |                |                         |
| RPL38P5-RPL38   | 1-1                     |                |                         |
| RPL4            | 12                      |                |                         |
| RPL5            | 15                      |                |                         |
| RPL6            | 18                      |                |                         |
| RPL7            | 10                      |                |                         |
| RPL7A           | 21                      |                |                         |
| RPL7L1          | 4                       |                |                         |
| RPL8            | 11                      |                |                         |
| RPL9            | 13                      |                |                         |
| RPL9P           | 7                       |                |                         |
| RPL9P9          | 1                       |                |                         |
| RPL9P2          | 11                      |                |                         |

**Figure S2.** (A) Mass spectrometric analysis shows protein intensity of isolated ribosomes of CSB-deficient cells compared to UVsKO cells, and quantification by volcano plot of the small 40S ribosome subunit and the large 60S ribosome subunit. (B) A bar plot of MS data with p-values (C) List of unique peptides/RP for label-free MS quantification.

Figure S3

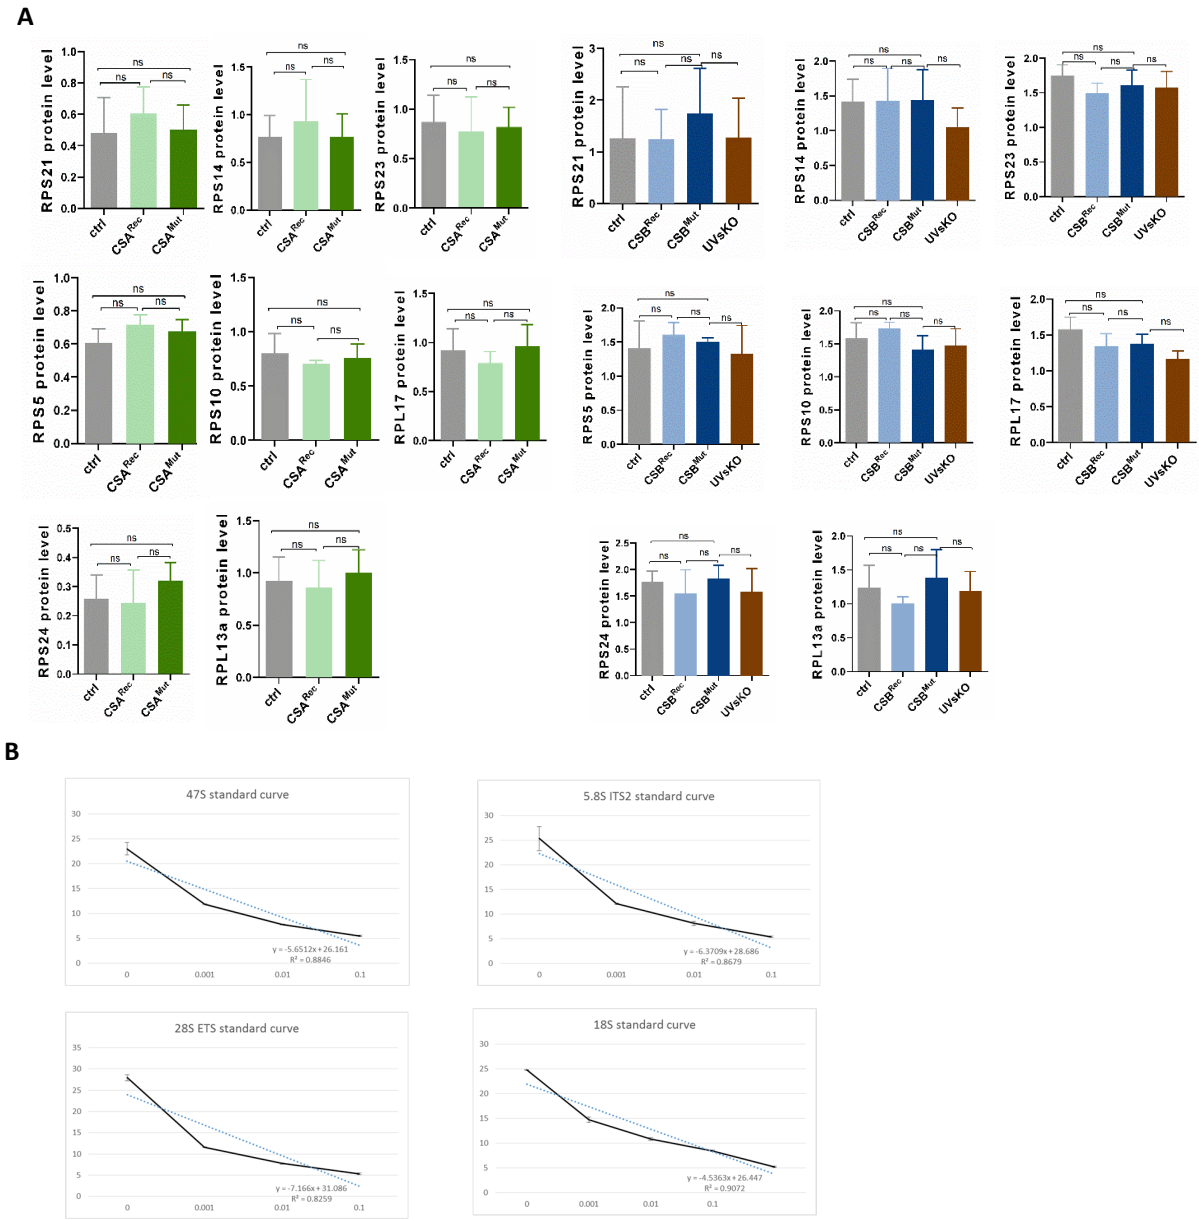

**Figure S3 A.**Quantification of Western Blots of ribosomal proteins in lysates. Values are represented as mean  $\pm$  SD of at least three independent experiments (\*= $p < 0.05$ , \*\*= $p < 0.01$ , \*\*\*= $p < 0.001$ ) **B.** Standard curves for qPCR
